# Supplementary material for: RAR/RXR binding dynamics distinguish pluripotency from differentiation associated cis-regulatory elements
Source: PubMed Central journal article supplement — Nucleic Acids Res. 2015 Apr 20;43(10):4833–54. doi: 10.1093/nar/gkv370 (PMC4446430; doi:10.1093/nar/gkv370), 2015-04-20

## Supplementary figure 1

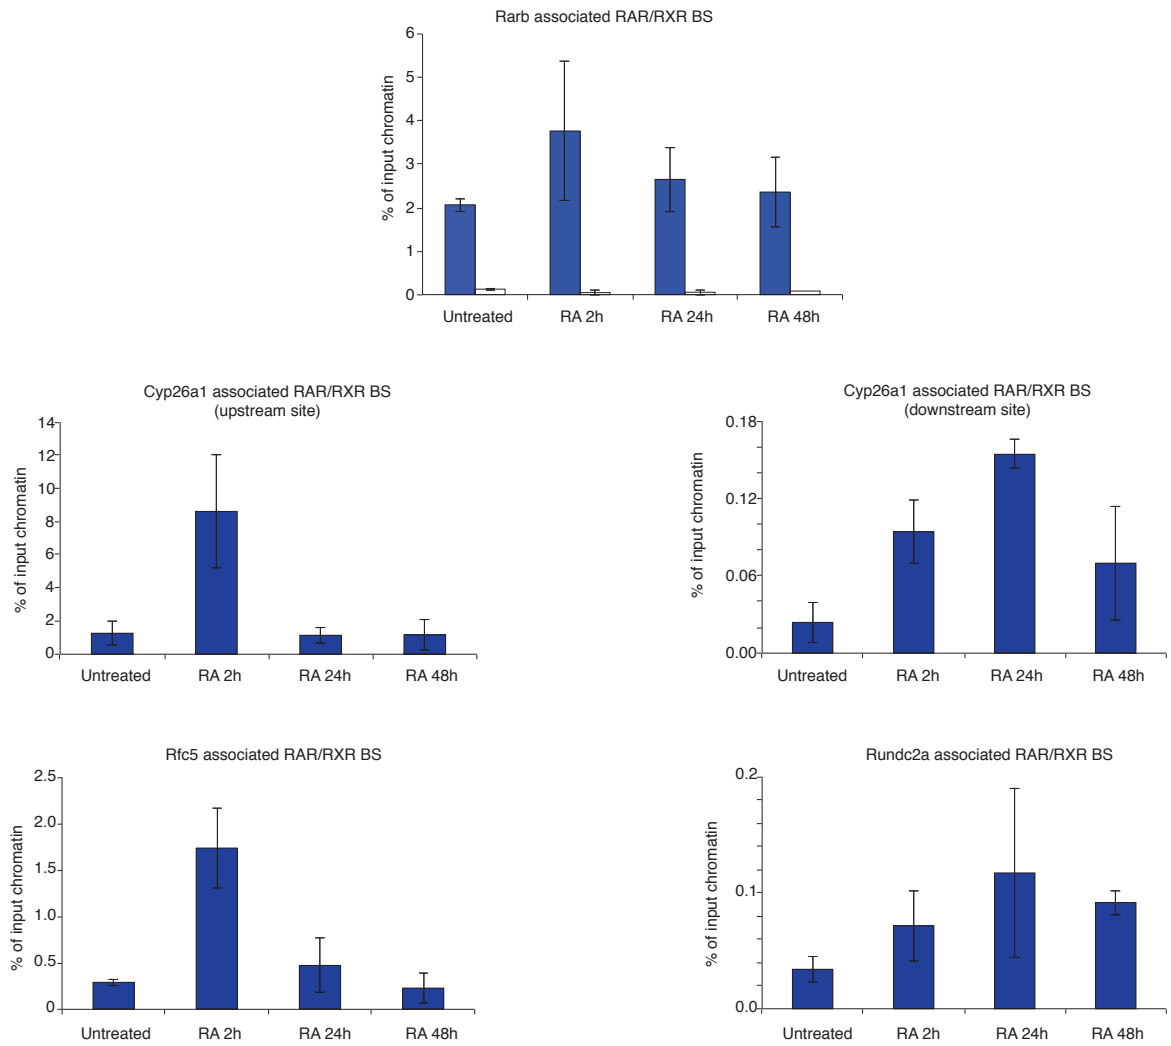

## Supplementary figure 2

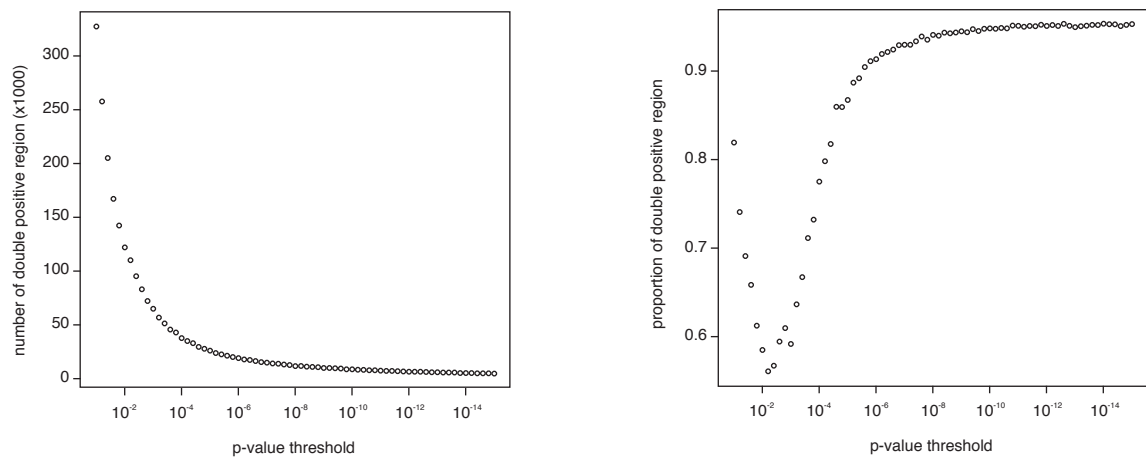

# Supplementary figure 3

## A

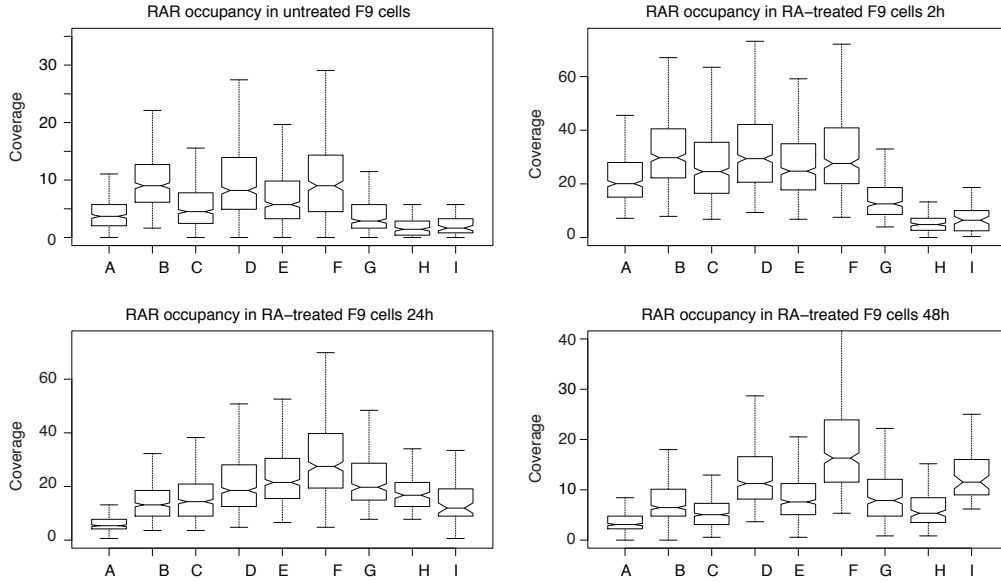

## B

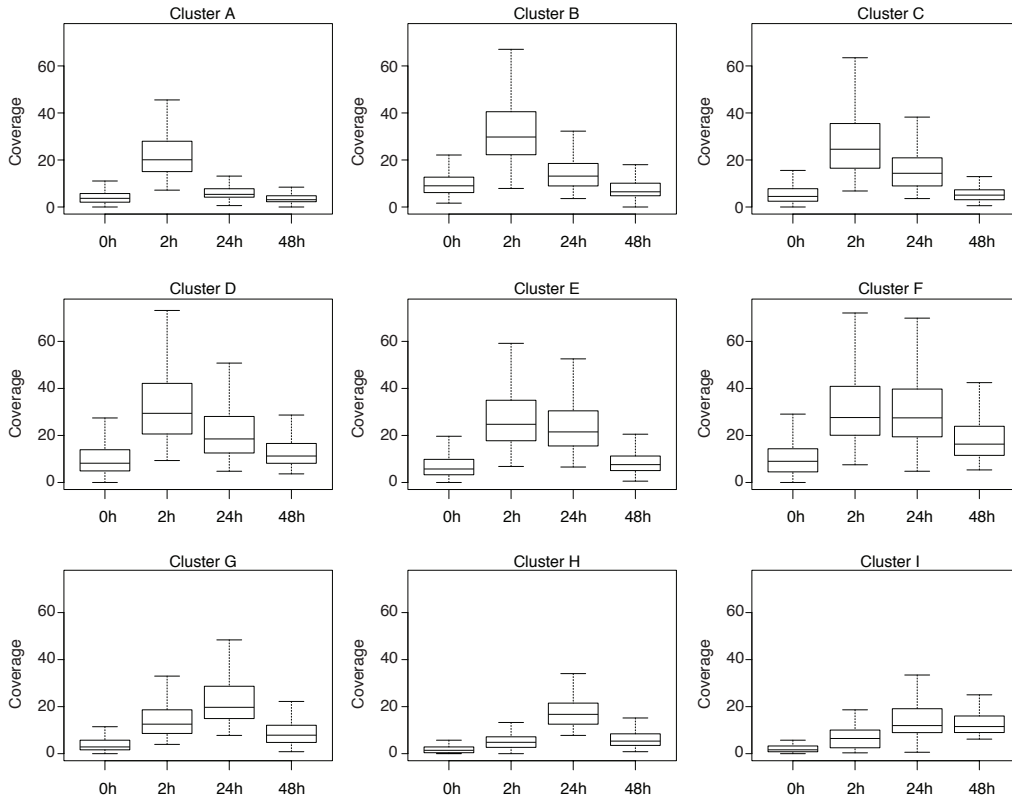

# Supplementary figure 4

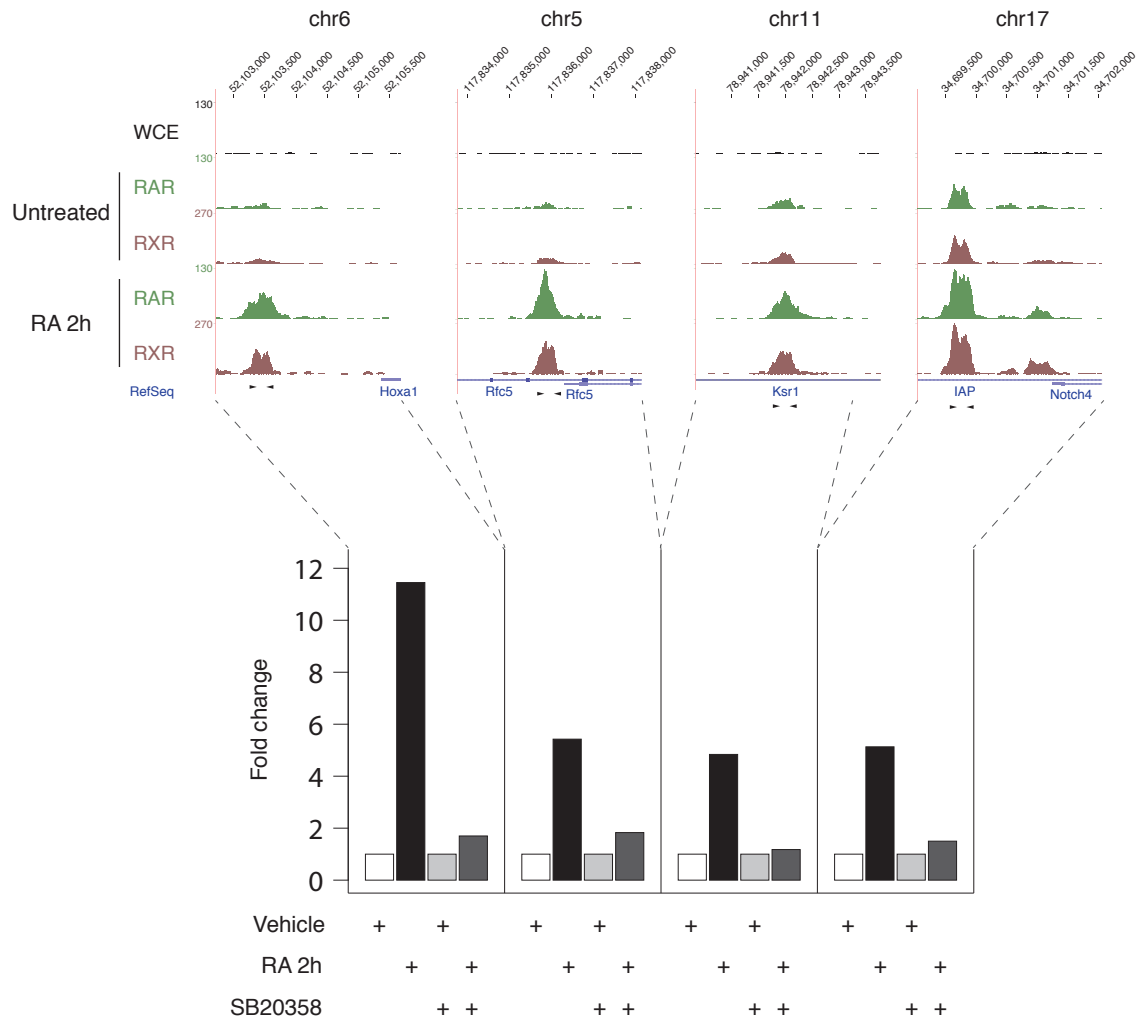

### Supplementary figure 5

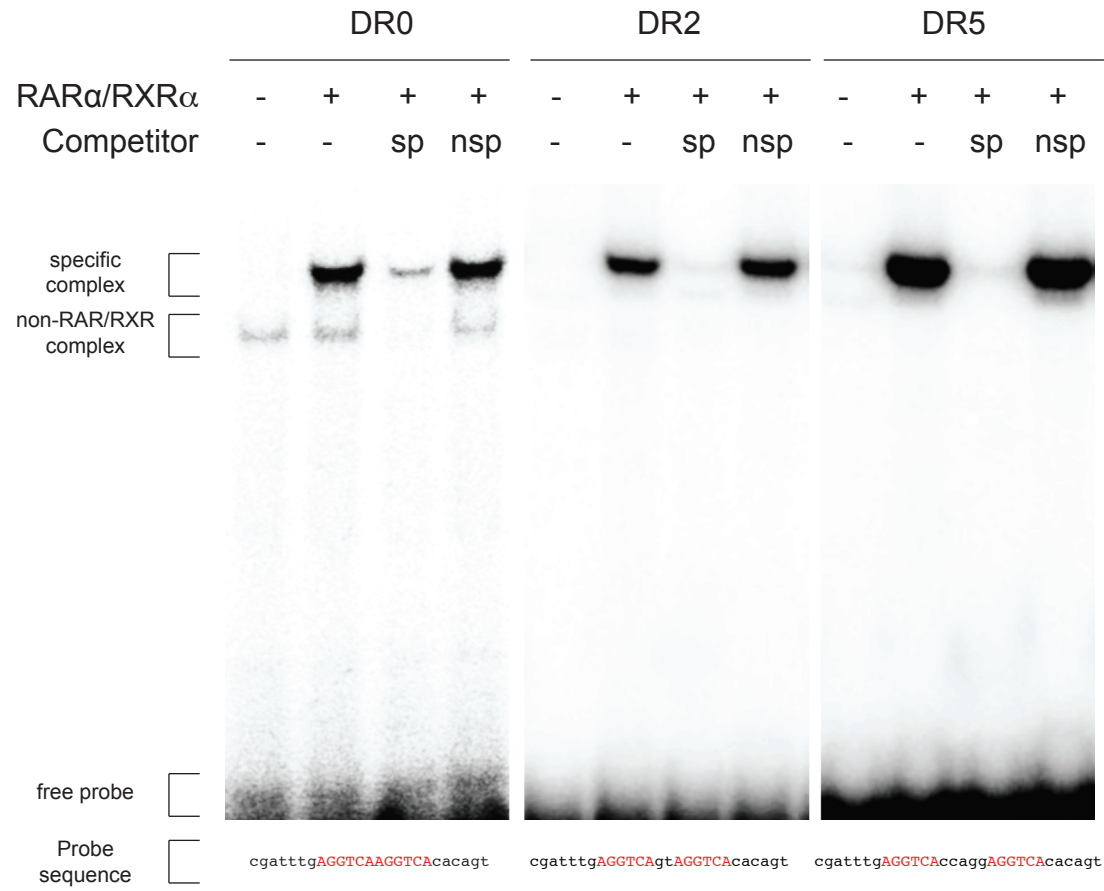

# Supplementary figure 6

A

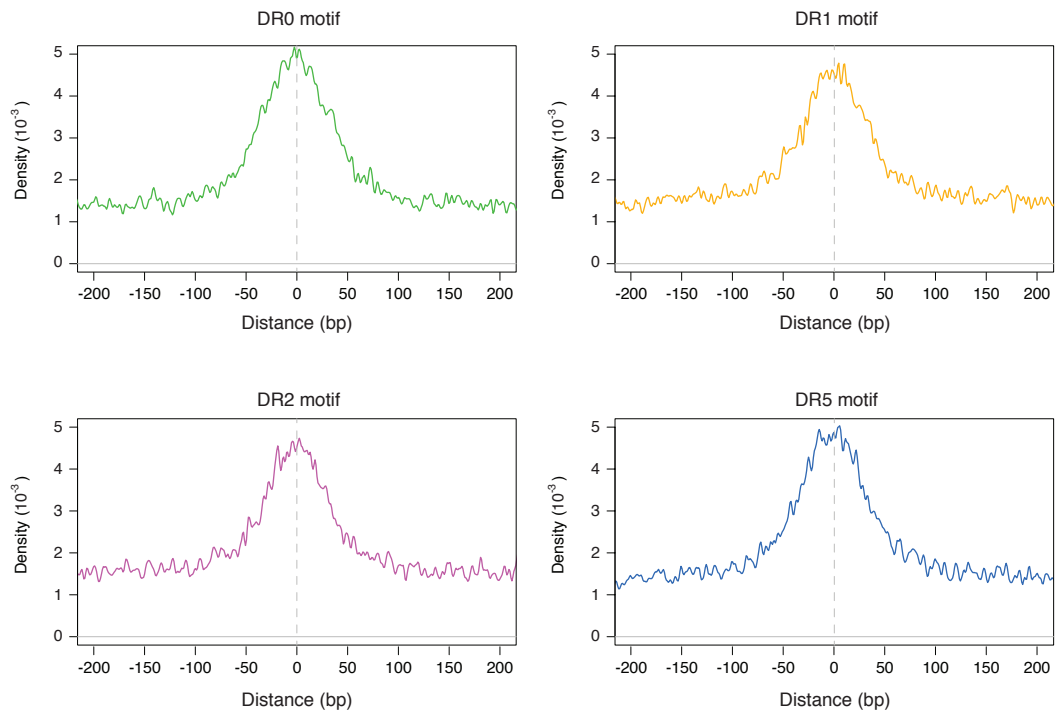

B

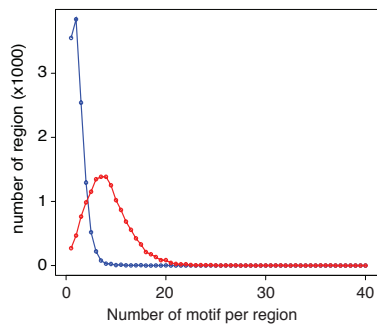

C

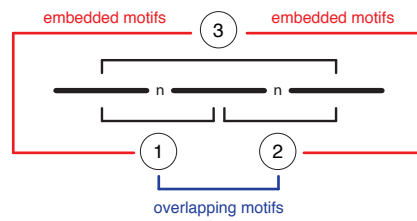

# Supplementary figure 7

A

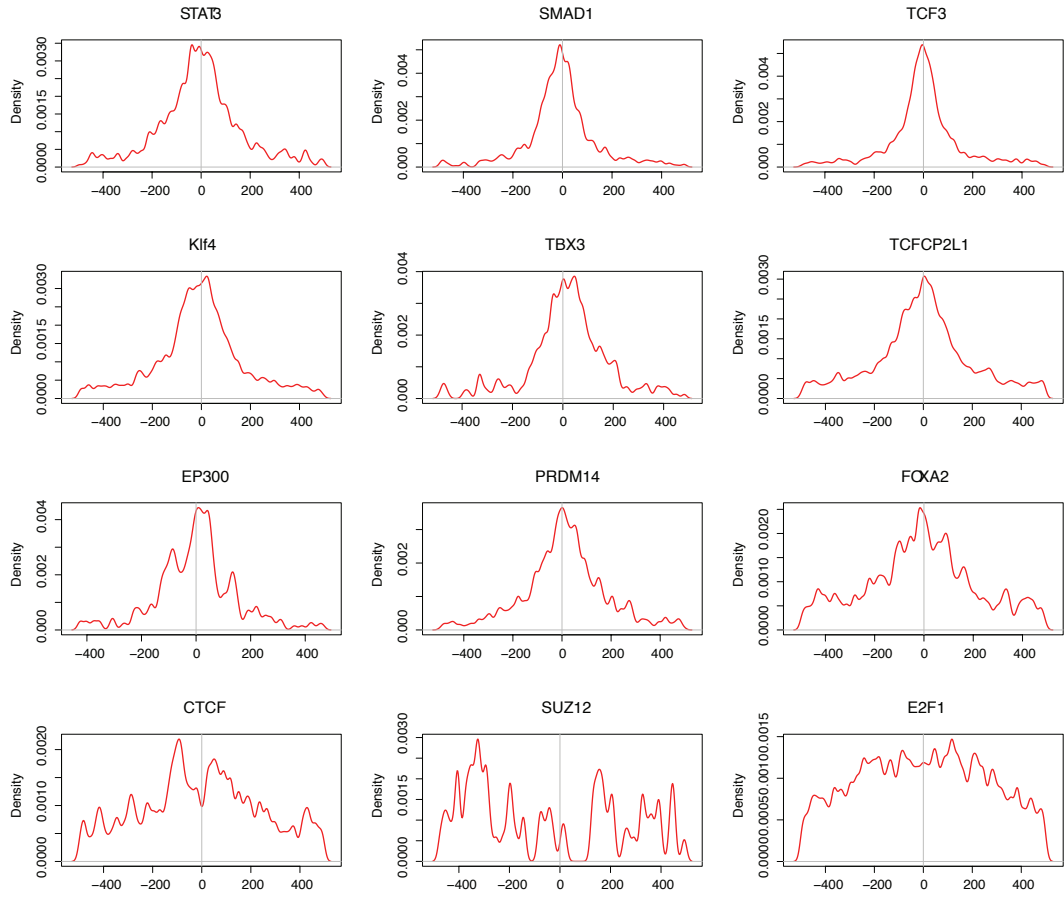

B

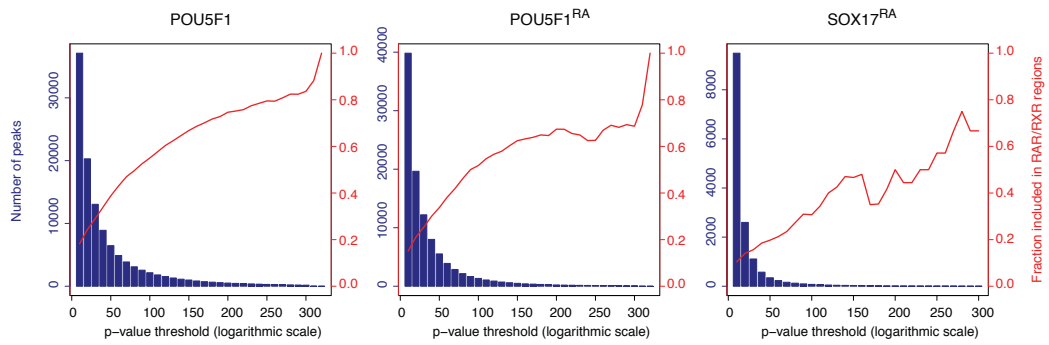

## Supplementary figure 8

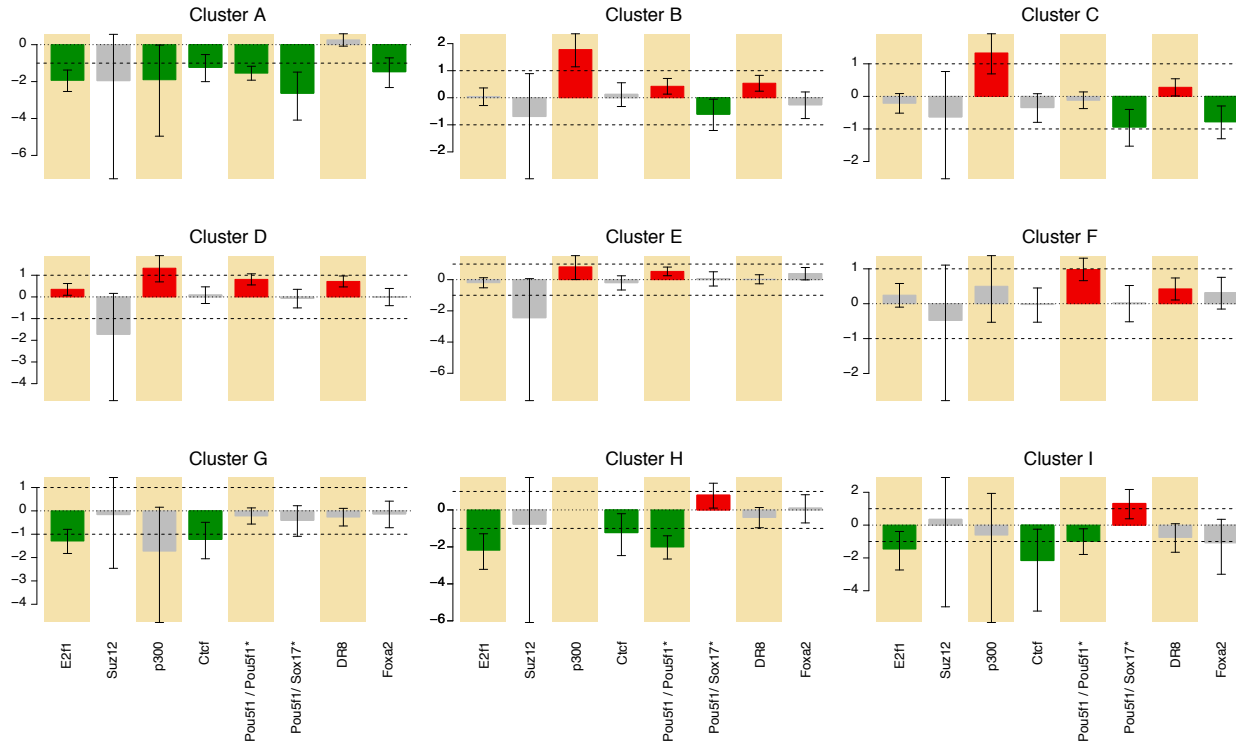

## Supplementary figure 9

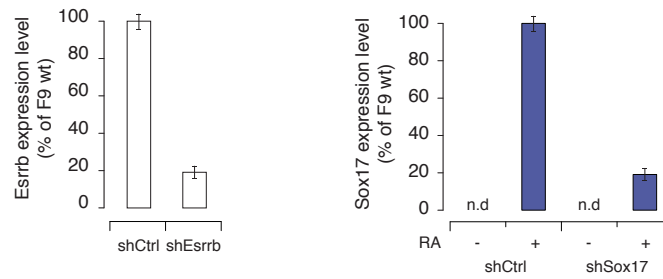

## Supplementary figure 10

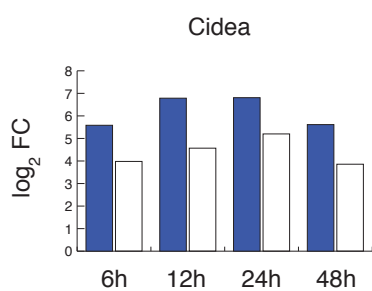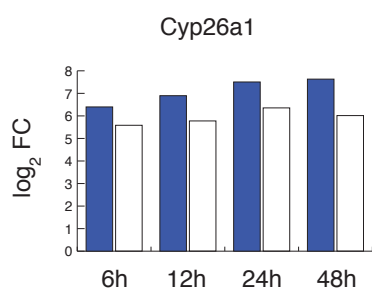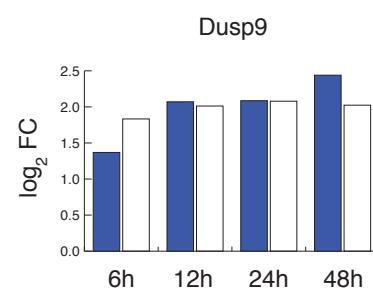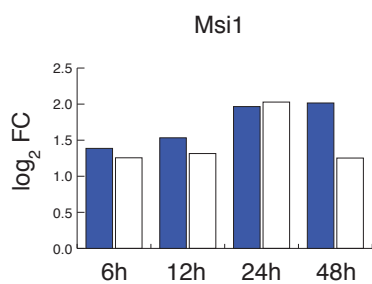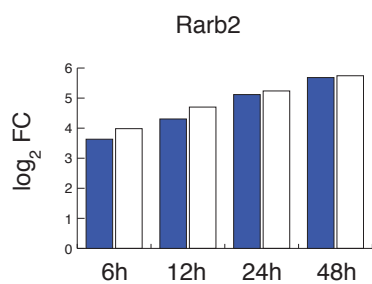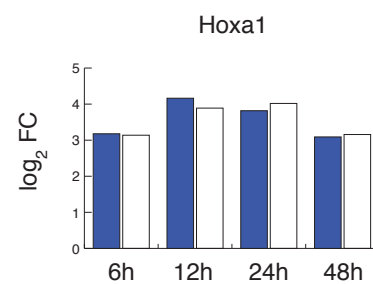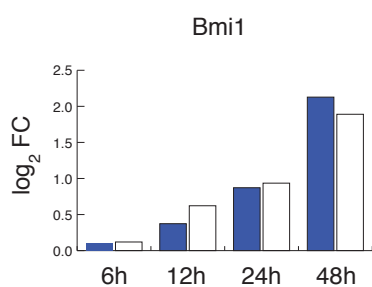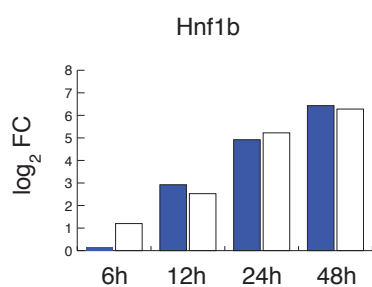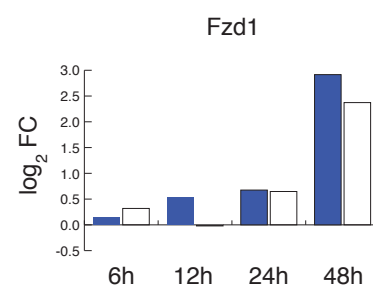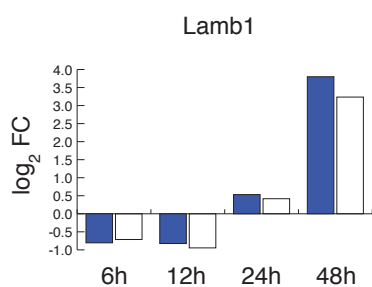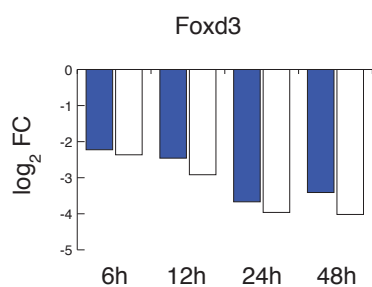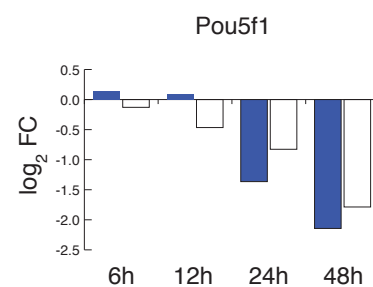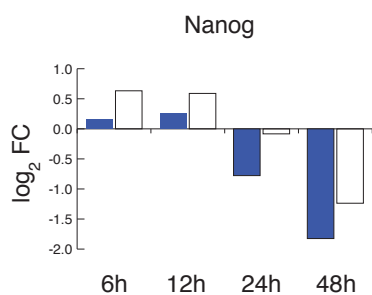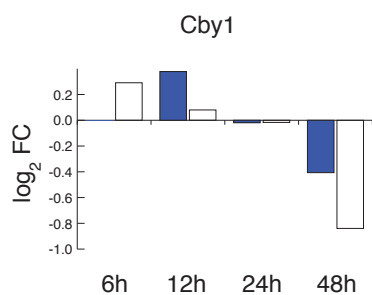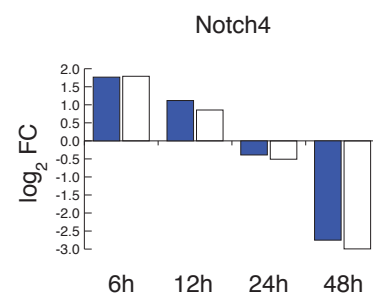



# Supplementary figure 11

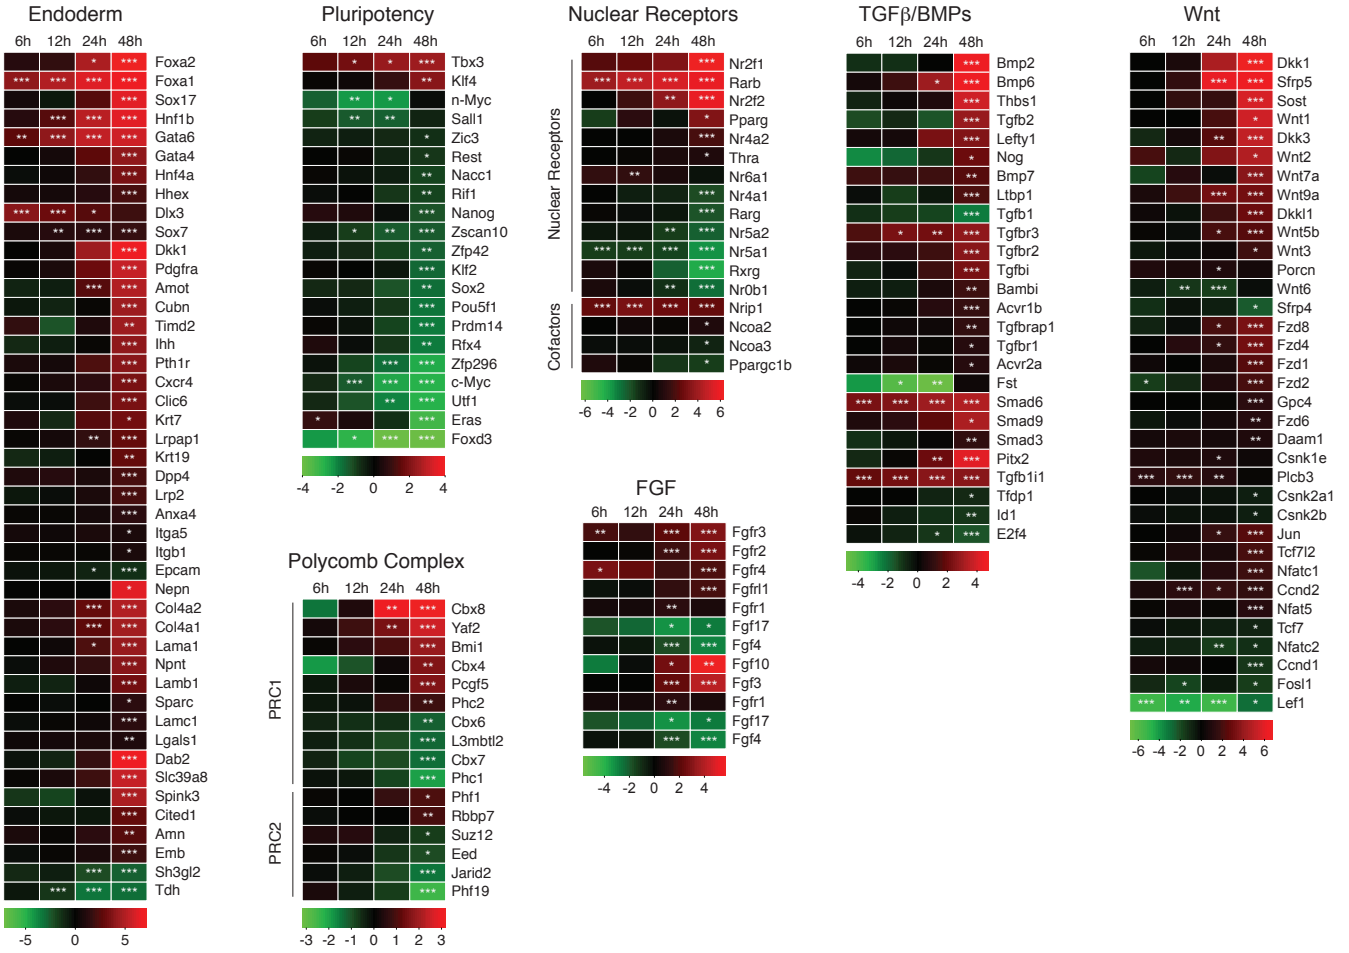

## Supplementary figure 12

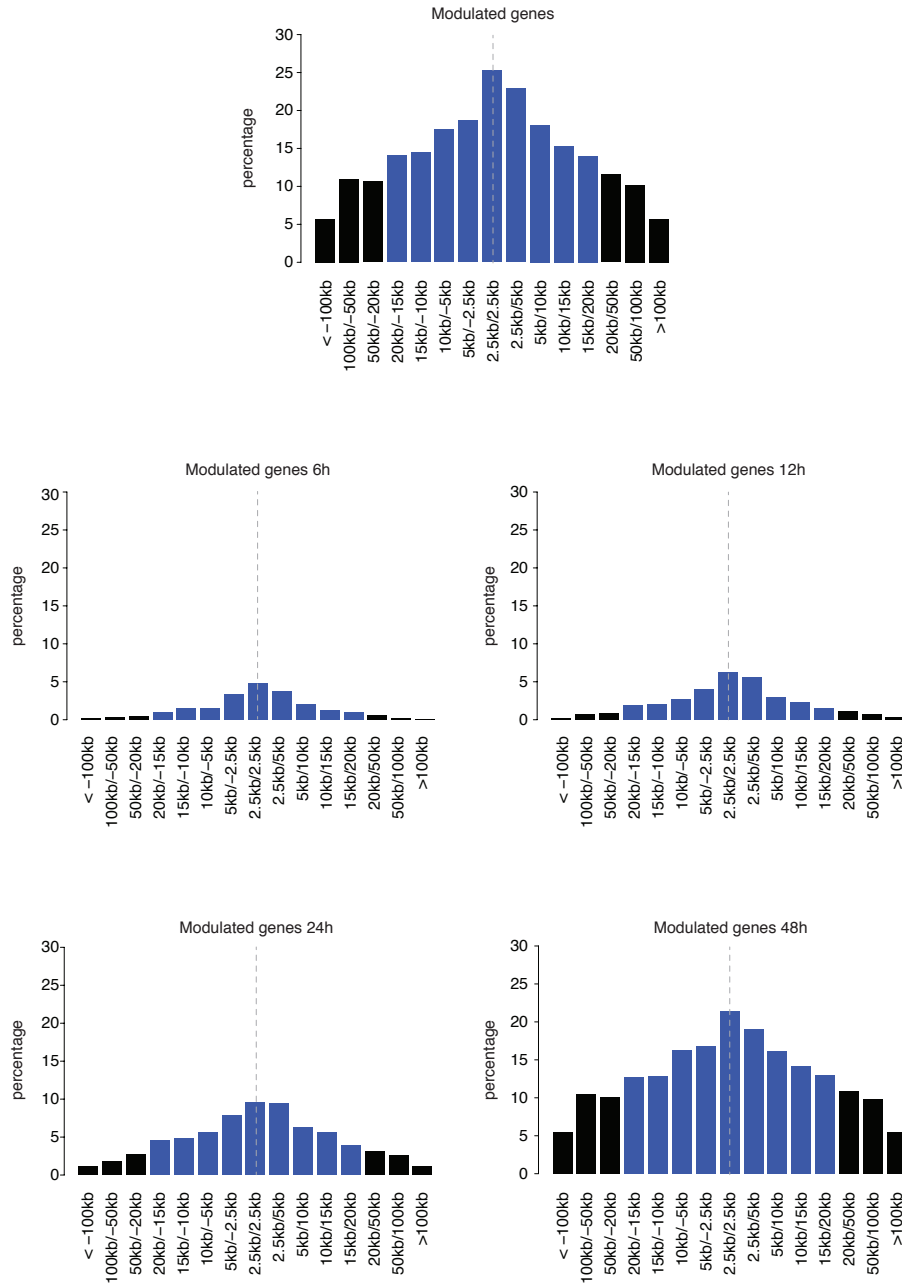

### Supplementary figure 13

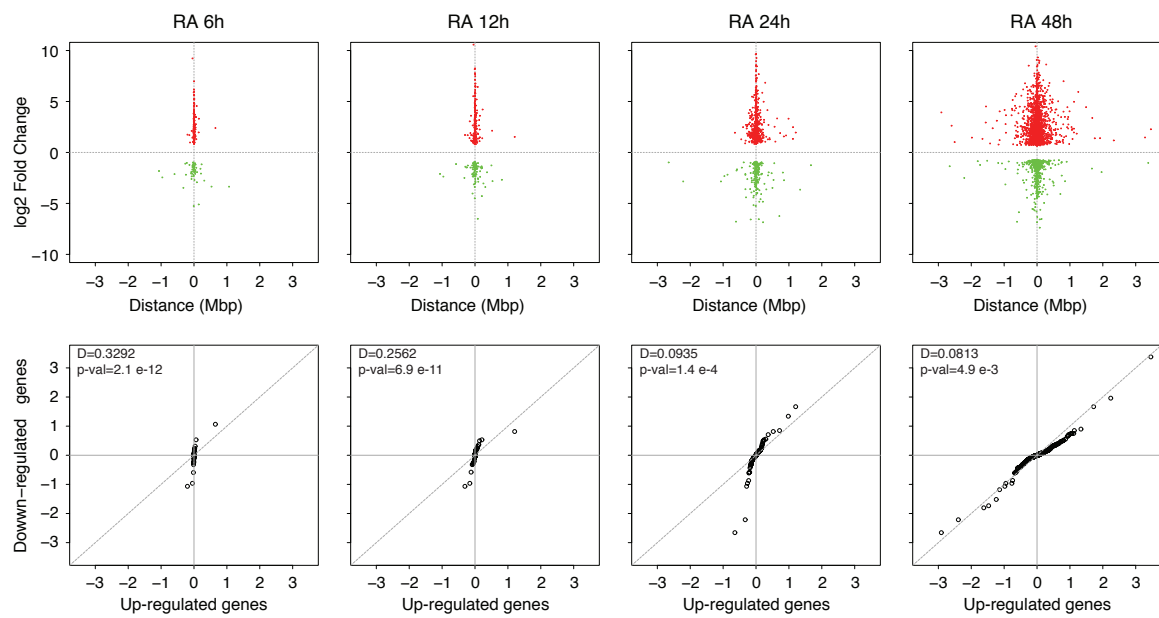

# Supplementary figure 14

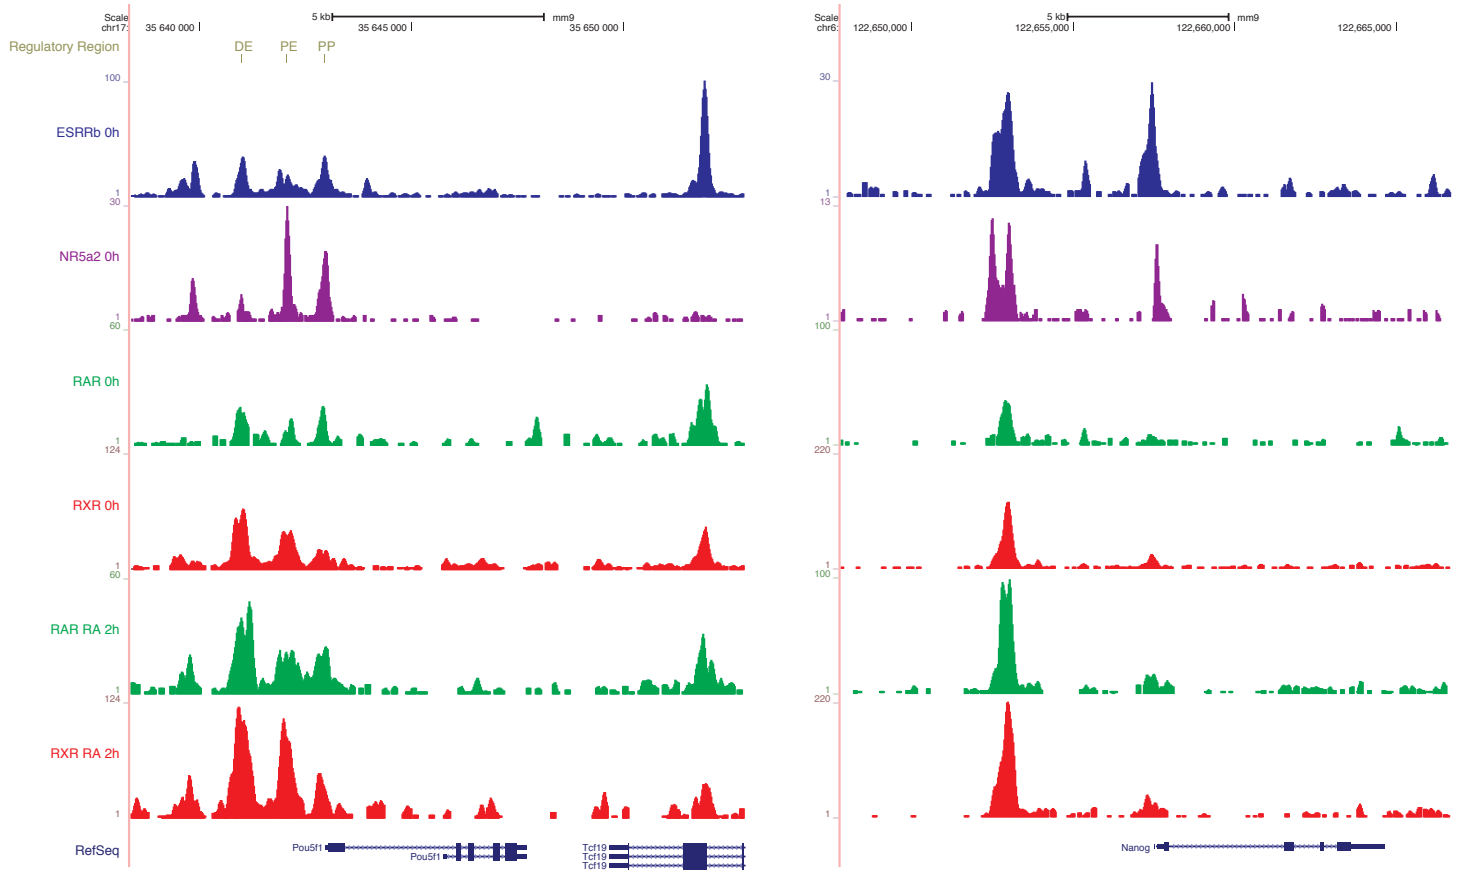

Supplement: supp_gkv370_nar-02176-x-2014-File012.pdf [file supp_gkv370_nar-02176-x-2014-File012.pdf]
