# Supplementary figures and images for: RAR/RXR binding dynamics distinguish pluripotency from differentiation associated cis-regulatory elements
Source: PubMed Central journal article supplement — Nucleic Acids Res. 2015 Apr 20;43(10):4833–54. doi: 10.1093/nar/gkv370 (PMC4446430; doi:10.1093/nar/gkv370), 2015-04-20

Supplementary Figure 6D

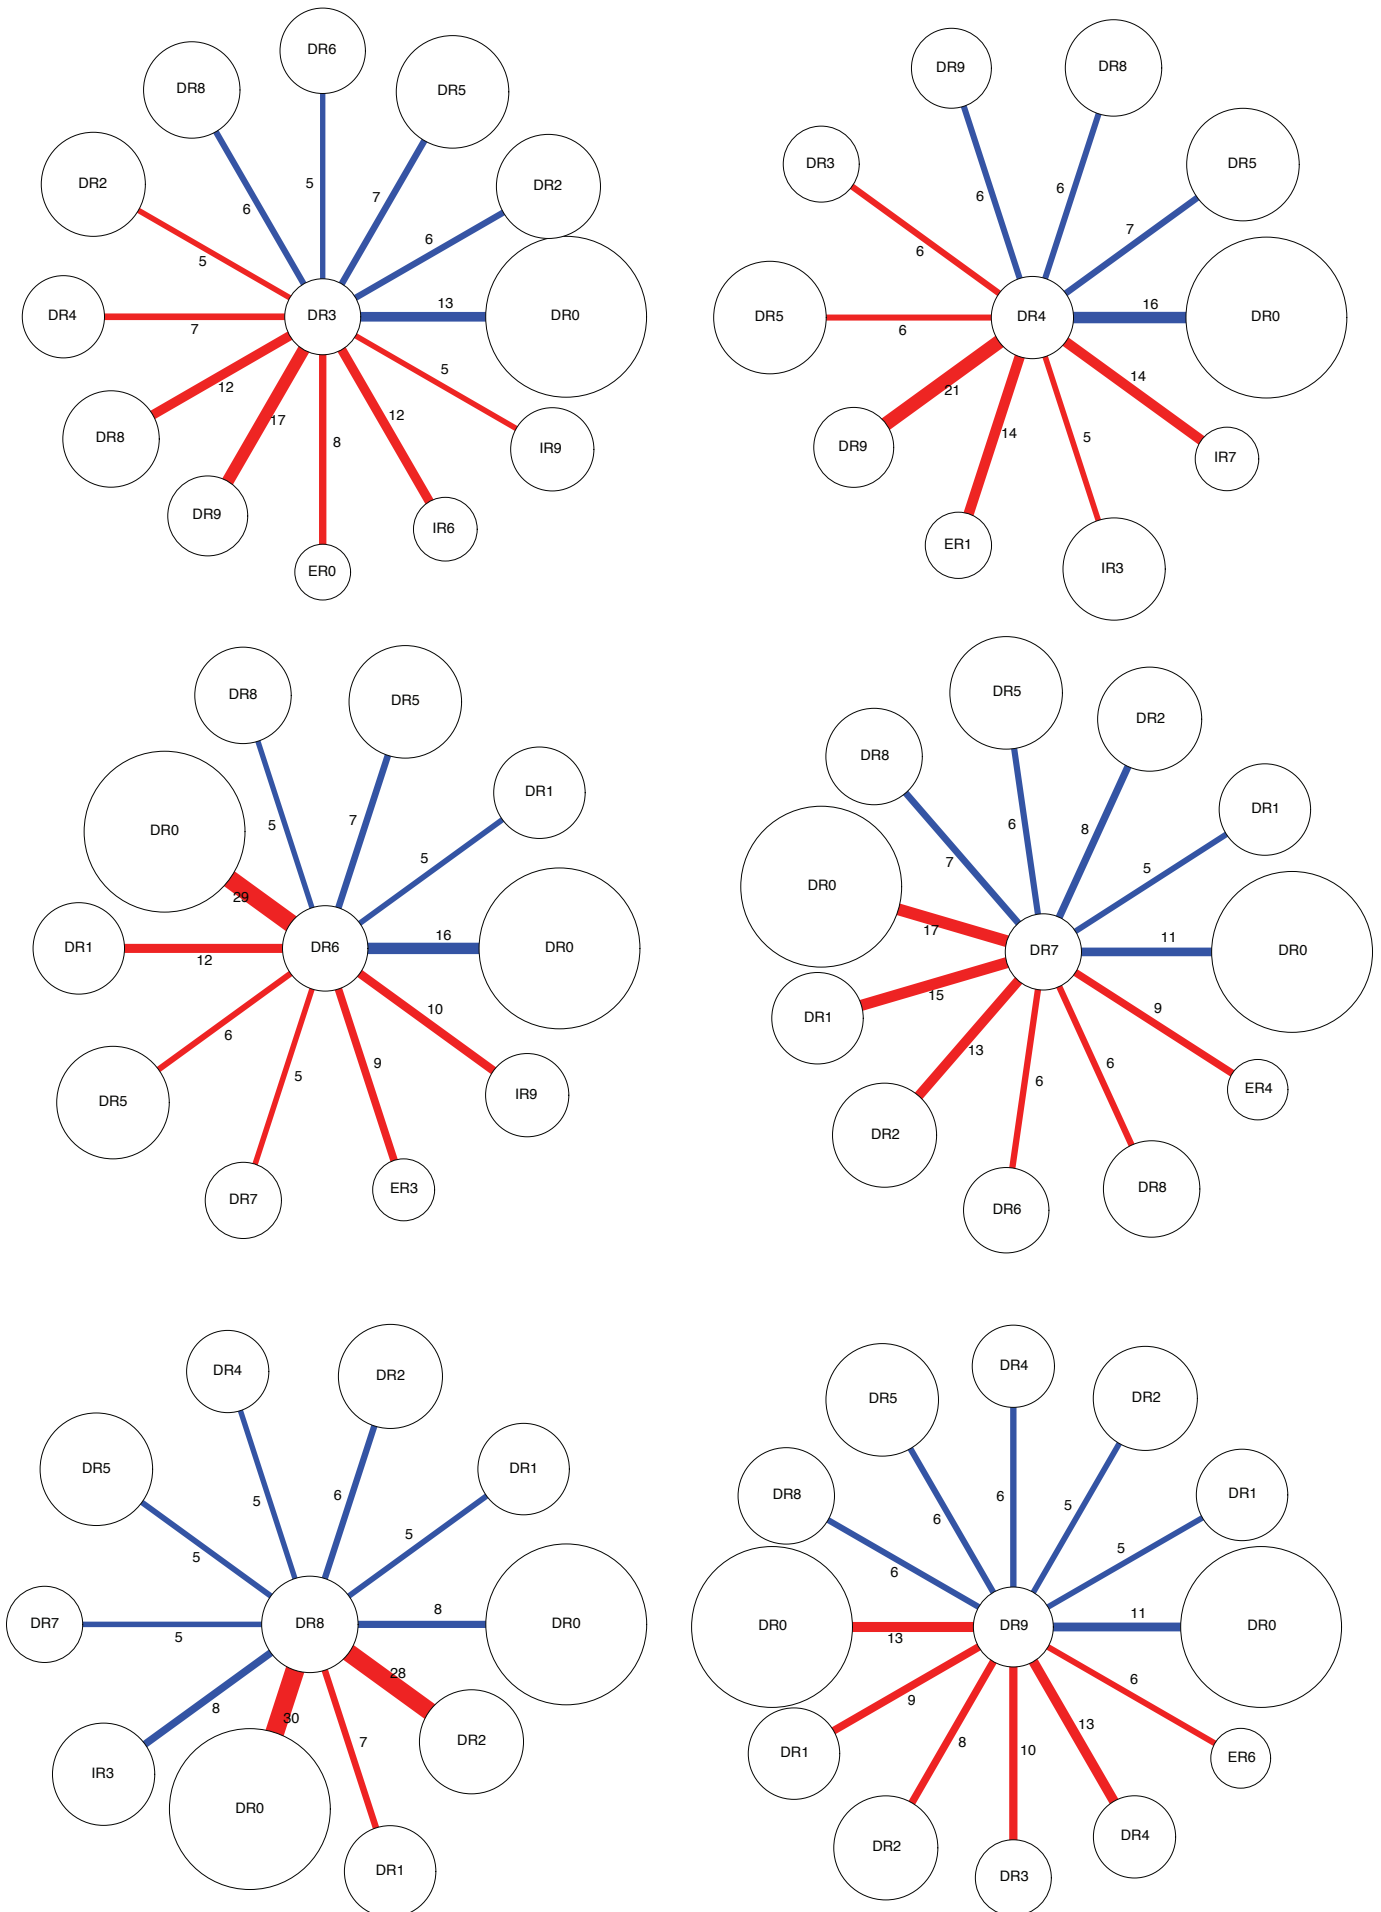

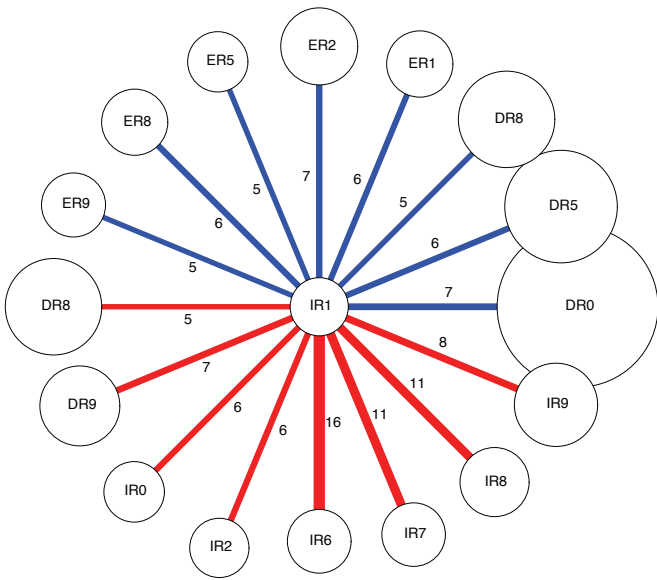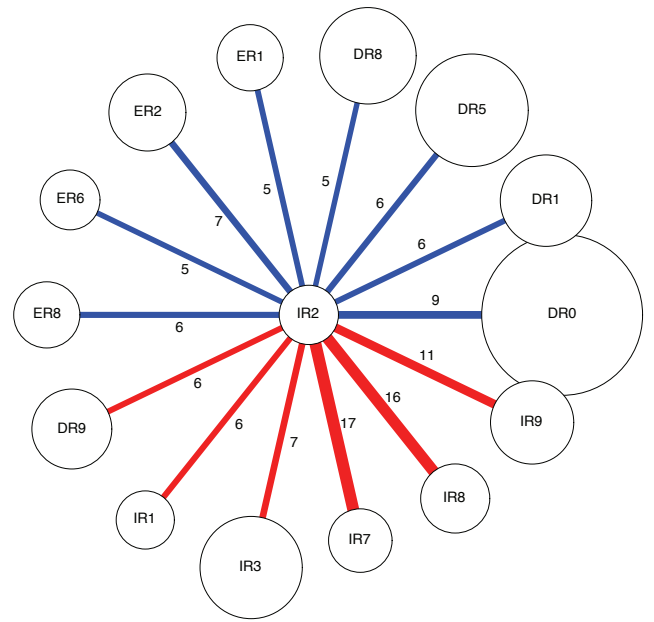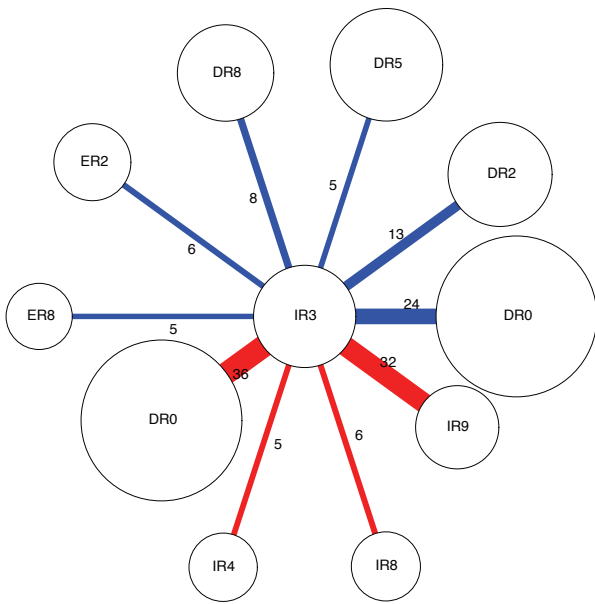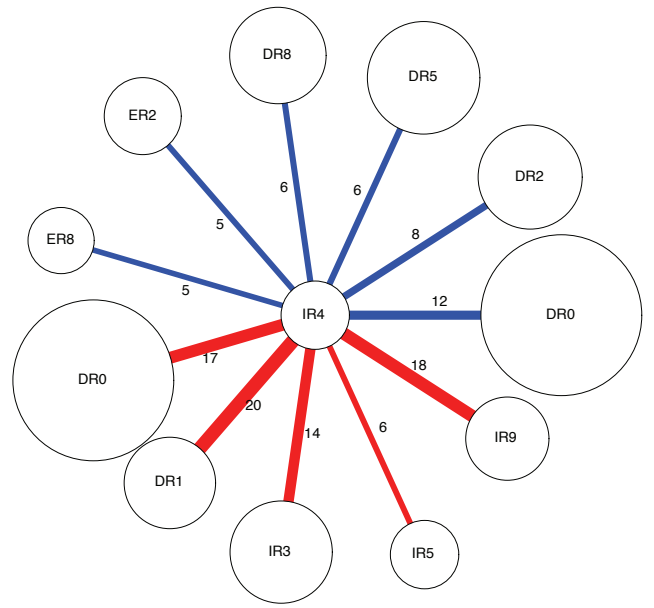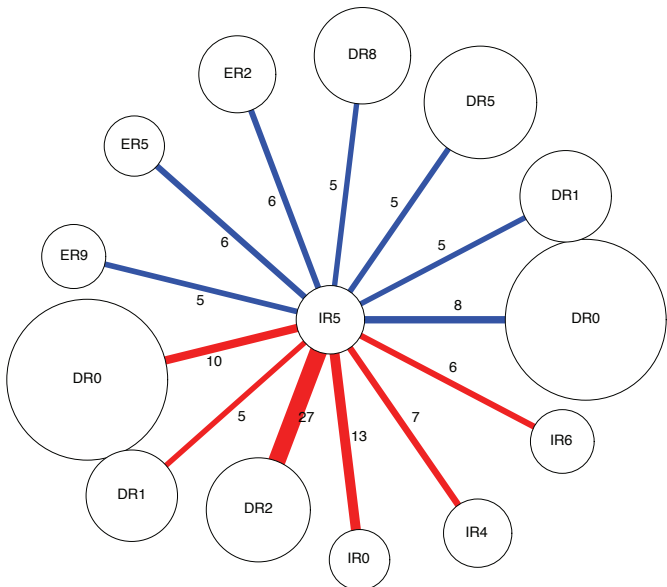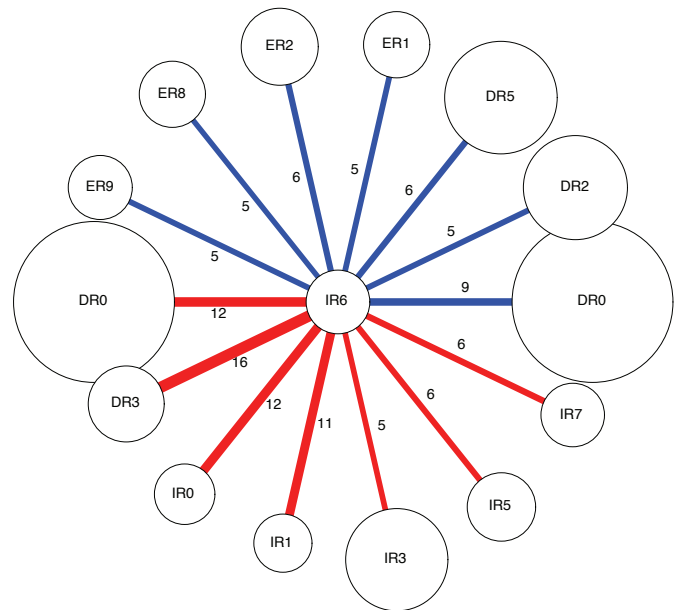

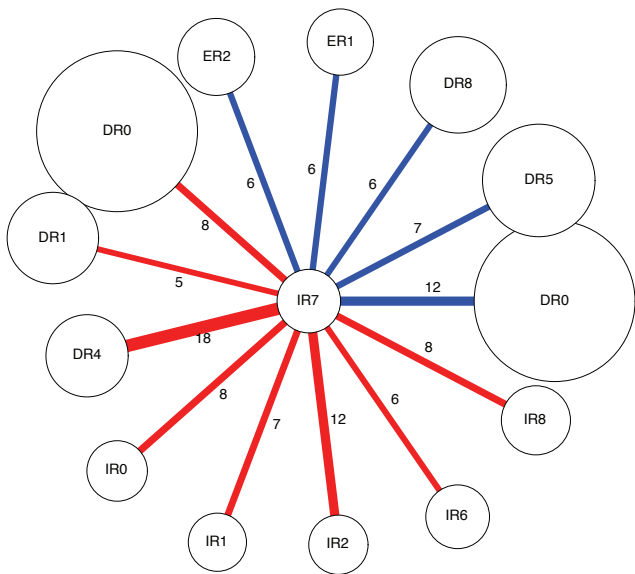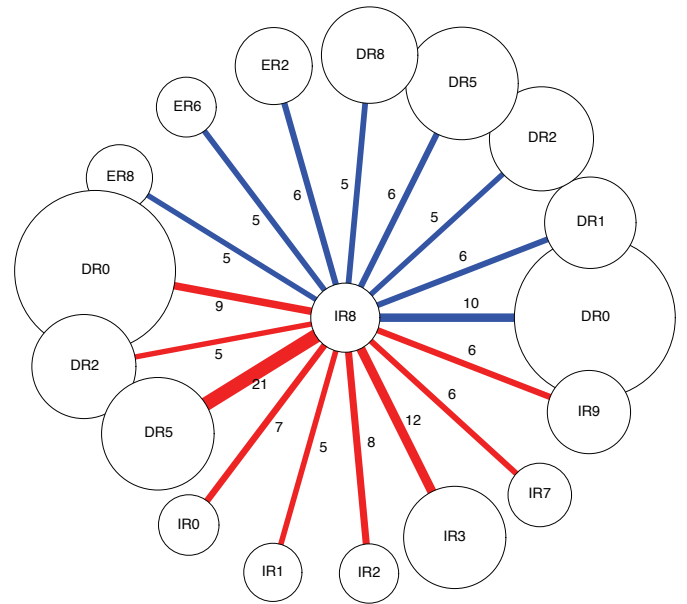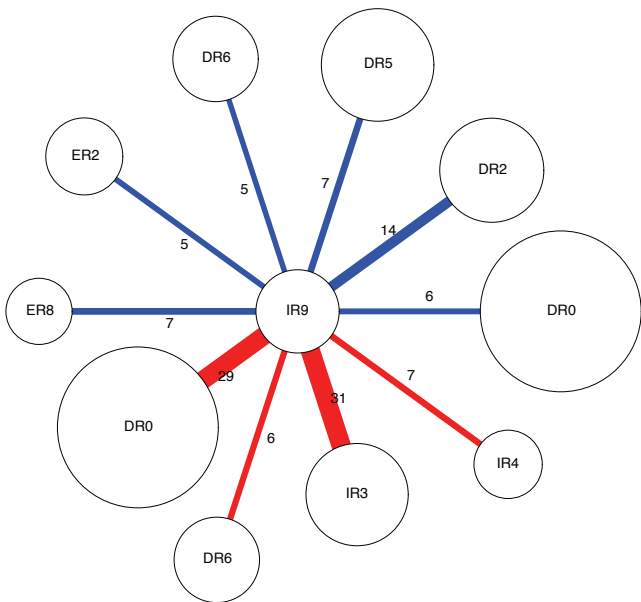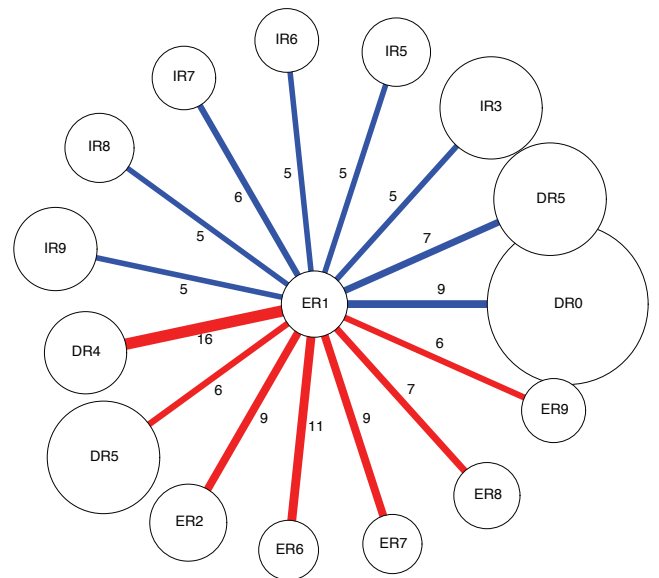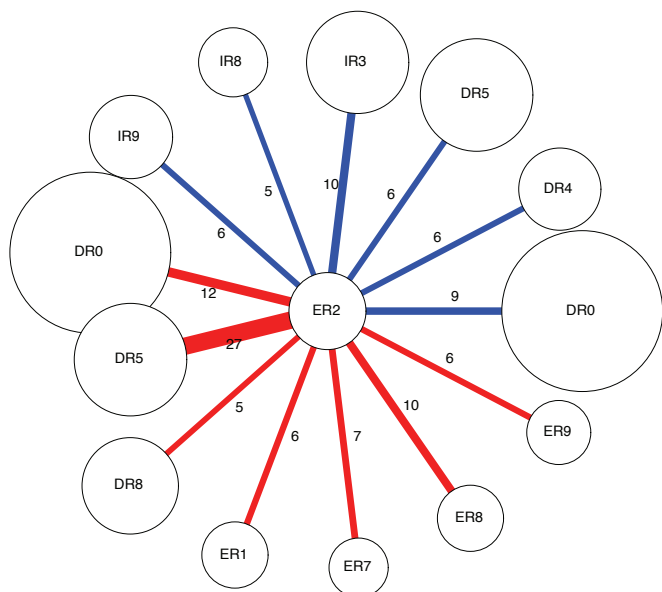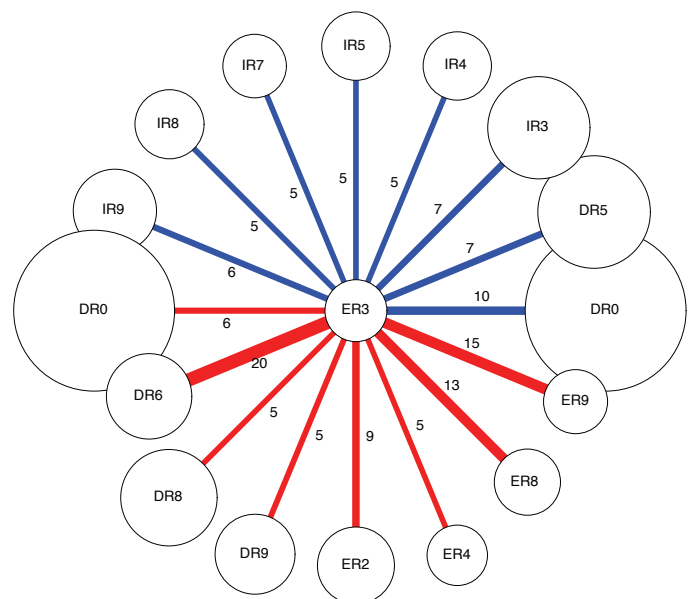

Supplement: supp_gkv370_nar-02176-x-2014-File013.pdf [file supp_gkv370_nar-02176-x-2014-File013.pdf]
